# Supplementary material
Source: PubMed Central journal article supplement (PMC5192131)
Supplement: AAC.01962-16_zac001175830s1.pdf [file AAC.01962-16_zac001175830s1.pdf]

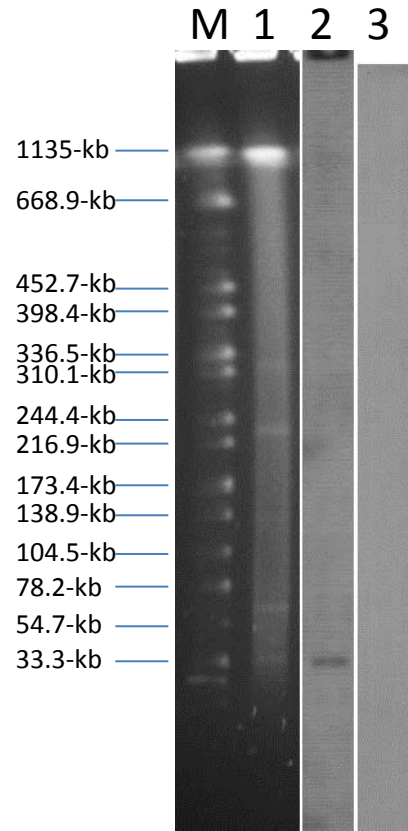

**Figure S1. S1-PFGE and Southern hybridization for *E. coli* GB090.**

M, marker. 1, PFGE separation of S1 nuclease-digested DNA from *E. coli* GB090. 2, Southern hybridization with a *mcr-1* gene probe. 3, Southern hybridization with a *bla*<sub>NDM</sub> gene probe.
